# Supplementary material for: Reaction induced phase separation in a bisphenol A-aniline benzoxazine/N,N′-(2,2,4-trimethylhexane-1,6-diyl)bis(maleimide)/imidazole blend: the effect of initial curing temperature on morphology and properties
Source: Royal Society of Chemistry journal article supplement (doi:10.1039/c3ra40868j), 2013-01-01
Supplement: c3ra40868j.pdf [file c3ra40868j.pdf]

## Supporting Information

### Reaction Induced Phase Separation in Bisphenol A-aniline benzoxazine/*N, N'*-(2, 2, 4-Trimethylhexane-1, 6-diyl) bis (maleimide)/imidazole blend: the Effect of Initial Curing Temperature on Morphology and Properties

*Zhi Wang, Zhen Zhang, Qichao Ran, Rongqi Zhu, Yi Gu\**

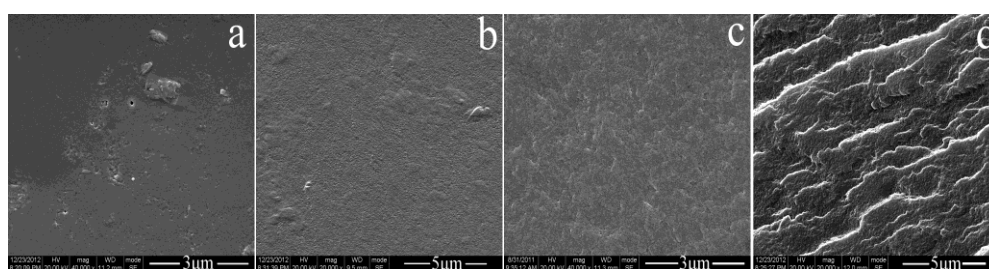

**Figure S1.** FESEM of BTI113 cured at 140 °C for different times

(a, 15mins; b, 30mins; c, 45mins; d, 60mins)

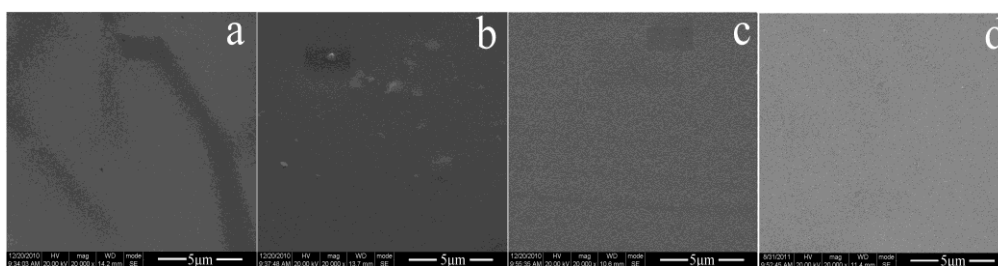

**Figure S2.** FESEM of BTI113 cured at 160 °C for different times

(a, 5mins; b, 10mins; c, 14mins; d, 30mins)

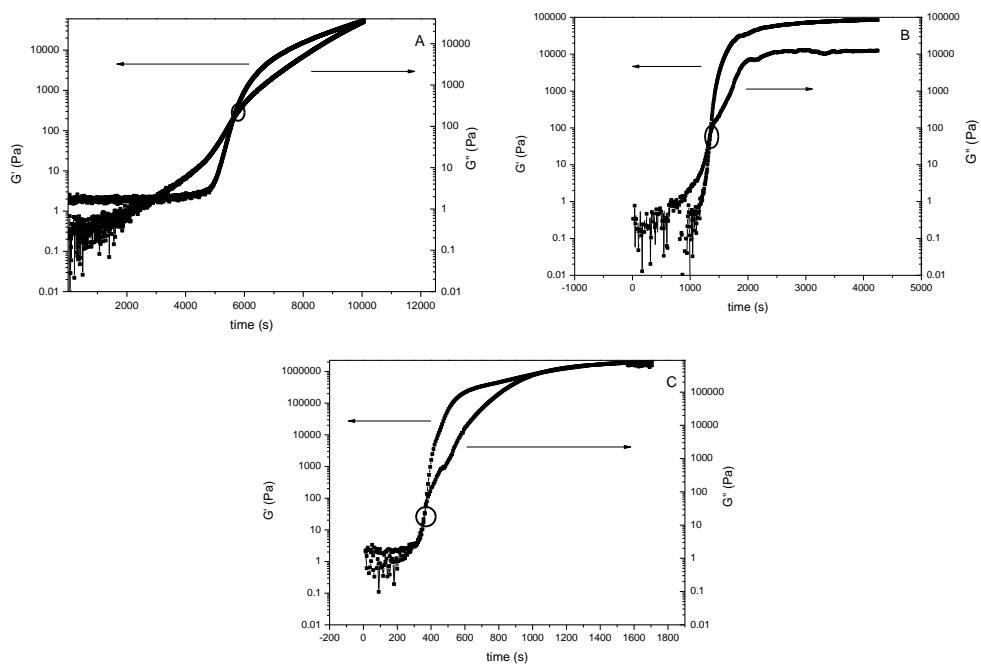

**Figure S3.**  $G'$  and  $G''$  curves of BTI113 at different temperature

(A, 120 °C; B, 140 °C; C, 160 °C)
